# Supplementary material for: Delineation of Mitochondrial DNA Variants From Exome Sequencing Data and Association of Haplogroups With Obesity in Kuwait
Source: Front Genet. 2021 Feb 11;12:626260. doi: 10.3389/fgene.2021.626260 (PMC7920096; doi:10.3389/fgene.2021.626260)
Supplement: Supplementary Table 1 — Haplogroup assignments using exome sequence data, Sanger sequencing data and whole genome sequence data. [file Table_1.XLSX]

## Sheet: Sheet1
SampeID	Dloop Sanger	Exome	Same Major haplogroup				SampeID	Exome	Whole genome	Dloop Sanger	Same Major and Subclade haplogroup
519	W	W6	YES				503	HV14a	HV14a	-	YES
520	W	W3b	YES				110	J1b2	J1b2	J1b2	YES
425	U7a	U7a4a1	YES				106	H6b	H6b	-	YES
98	U7	U7a	YES
386	U4a	U4a1	YES
437	U4a	U4a1	YES
526	U3a	U3b	YES
432	U2c	U2c1b	YES
426	U2a	U2a	YES
510	U1b	U1b2	YES
122	U3	U1a1a	YES
431	T2	T2h	YES
377	T2i	T2g	YES
233	T2c	T2c1d1	YES
369	T2c	T2c1d1	YES
4375	T2c	T2c1+146	YES
547	T	T2	YES
522	T1	T1a8a	YES
97	T1a	T1a1	YES
222	R8a	R8a1a1b	YES
297	R0a	R0a2c	YES
165	R0a	R0a2	YES
242	R0a	R0a1a	YES
421	R0a	R0a1a	YES
440	R0a	R0a1a	YES
228	N1b	N1b1a5	YES
409	N1b	N1b1a5	YES
151	N1b	N1b1a3	YES
113	N1b	N1b1a2	YES
163	N1b	N1b1a	YES
4362	N1b	N1b1a	YES
424	N1a	N1a3a	YES
264	N1a	N1a3	YES
180	N1a	N1a1a3	YES
511	N1a	N1a1a3	YES
238	N3	N1a1a1a1	YES
370	M5a	M5a2a1a2	YES
314	M5a	M5a2a1a1	YES
300	M35b	M38a	YES
120	M38a	M35b+16304	YES
435	M33a	M35b	YES
551	M2a	M2a1a2	YES
434	L3i	L3i2	YES
418	L3f	L3f1b+16292	YES
223	L3f	L3f1b	YES
286	L3f	L3f1b	YES
298	L3f	L3f	YES
415	L3e	L3e1d1	YES
384	L3e	L3e1a2	YES
158	L3d	L3d1a1a	YES
254	L2a	L2a1c+16129	YES
538	L3k	L2a1c+16129	YES
543	L2a	L2a1a2	YES
217	L2a	L2a1+143+16189 (16192)+@16309	YES
225	L2a	L2a1+143+@16309	YES
277	L1c	L1c2b2	YES
408	L1c	L1c2b2	YES
302	L1c	L1c2b1a	YES
395	L0a	L0a2a2a	YES
162	L0a	L0a1d	YES
159	K2a	K2a2a	YES
293	K1b	K1b2a	YES
234	K1a	K1a4f1	YES
389	K1a	K1a4f1	YES
4512	J2b	J2b2	YES
517	J1b	J2a2a1a1	YES
161	J1d	J1d1a1	YES
224	J1d	J1d1a1	YES
236	J1d	J1d1a1	YES
250	J1d	J1d1a1	YES
363	J1d	J1d1a1	YES
413	J1d	J1d1a1	YES
427	J1d	J1d1a1	YES
546	J1d	J1d1a1	YES
206	J1d	J1d1a	YES
406	J1	J1d	YES
315	J1c	J1c2i	YES
310	J1c	J1c1b1a	YES
208	J1c	J1c15b	YES
438	J1c	J1c15	YES
312	J1b	J1b3b1	YES
3636	J1b	J1b3b1	YES
246	J1b	J1b2a	YES
280	J1b	J1b2	YES
375	J1b	J1b2	YES
398	J1b	J1b2	YES
500	J1b	J1b2	YES
523	J1b	J1b2	YES
110	J2a	J1b2	YES
382	J1b	J1b1b1	YES
489	J1c	J1b1b1	YES
430	J1b	J1b1a3	YES
528	J1b	J1b1a3	YES
530	J1b	J1b1a3	YES
167	J1b	J1b1a1+146	YES
144	HV19	HV1b	YES
422	HV1a	HV1a1	YES
392	HV1	HV1	YES
525	HV1	HV1	YES
372	H3x	H92	YES
515	H2a	H7	YES
380	H1a	H66	YES
390	H5	H5c	YES
544	H5	H5c	YES
311	H5	H5+16311	YES
140	H1m	H2a2	YES
396	H2a	H2a1e1a	YES
428	H2a	H29a	YES
379	H1z	H1z1	YES
136	H2a	H14b	YES
493	H2a	H14b	YES
521	H14a	H14a+146	YES
542	H2a	H14a	YES
148	H2a	H13c1a	YES
166	H13a	H13a2b3	YES
524	H1e	H13a2a	YES
529	H103	H+195	YES
368	H7d	H+152	YES
412	H1a	H	YES
378	H1e	H	YES
394	H2a	H	YES
494	H2a	H	YES
381	H85	H	YES
485	T1a	X2+225	NO
501	J1b	U7a4a1a	NO
296	H57	U7a4a1	NO
128	J1b	U7a4a1	NO
486	N1b	U7a4a1	NO
497	HV4b	U7a3a	NO
154	M30	U7a	NO
231	L3e	U1a1a	NO
532	HV1	T1b	NO
109	H5	T1a10	NO
285	H101	R8a2	NO
149	H2a	R0a2k	NO
429	H57	R0a2k	NO
175	T1a	R0a2h	NO
111	H2a	R0a2f	NO
303	J1	R0a1a3	NO
139	U7	R0a1a1a	NO
138	L3e	R0a1a	NO
132	N1a	R0a1a	NO
4154	J1b	R0a1+152	NO
299	J1d	R0a1	NO
436	J1	R	NO
499	U7a	N1b1a5	NO
119	J1b	N1a3a	NO
178	R0a	N1a3a	NO
145	W	N1a3a	NO
537	HV1b	M6a	NO
305	J1b	M1a1b1b1	NO
496	H1a	L5a1a	NO
116	J1b	L3x1+16311	NO
188	L3d	K2a5b	NO
107	J1b	K1a4a	NO
131	U1b	K1a15	NO
115	N3	K1a+195	NO
133	H2a	J2a2a1a1	NO
114	W	J2a2a1a1	NO
512	N1b	J1d1a1	NO
181	H14a	J1b2	NO
262	I1d	J1b2	NO
203	U7a	J1b1b1c	NO
129	H32	J1b1b1	NO
123	W	J1b1b1	NO
536	N1a	HV0f	NO
186	K1a	HV	NO
106	R2	H6b	NO
488	K1a	H6a1b2	NO
172	U3	H13c1	NO
125	H3a	HV2	NO
176	HV9b	H2b	NO
492	HV4b	H14a	NO
